# Supplementary material for: Placenta DNA methylation at ZNF300 is associated with fetal sex and placental morphology
Source: bioRxiv or medRxiv preprint supplement (doi:10.1101/2021.03.05.433992), 2021-03-08
Supplement: Supplementary file [file media-1.pdf]

**This file contains the following information:**

**Supplementary Tables:**

Supplementary Table 1.....page 2  
Supplementary Table 2.....page 3  
Supplementary Table 3.....page 4  
Supplementary Table 4.....page 5-10  
Supplementary Table 5.....page 11

**Supplementary Figures:**

Supplementary Figure 1.....page 12  
Supplementary Figure 2.....page 13  
Supplementary Figure 3.....page 14  
Supplementary Figure 4.....page 15  
Supplementary Figure 5.....page 16  
Supplementary Figure 6.....page 17  
Supplementary Figure 7.....page 18  
Supplementary Figure 8.....page 19

**Supplementary Table 1.** Descriptive characteristics of the Early Autism Risk Longitudinal Investigation (EARLI) samples with placenta whole genome bisulfite sequencing measures

|                                                     | <i>Number (%)</i>     |                       | <b>p-value</b>     |
|-----------------------------------------------------|-----------------------|-----------------------|--------------------|
|                                                     | <b>Males (n=76)</b>   | <b>Females (n=57)</b> |                    |
| <b><i>Neurodevelopmental diagnosis at age 3</i></b> |                       |                       | 0.004 <sup>a</sup> |
| Typically Developing                                | 17 (0.22)             | 20 (0.35)             |                    |
| Non-Typically Developing                            | 26 (0.34)             | 24 (0.42)             |                    |
| Autism Spectrum Disorder                            | 18 (0.24)             | 1 (0.02)              |                    |
| Lost to follow up                                   | 15 (0.20)             | 12 (0.21)             |                    |
| <b><i>Race</i></b>                                  |                       |                       | 0.467 <sup>a</sup> |
| White                                               | 43 (0.57)             | 26 (0.46)             |                    |
| Black                                               | 6 (0.08)              | 4 (0.07)              |                    |
| Asian                                               | 12 (0.16)             | 8 (0.14)              |                    |
| Other/Missing                                       | 15 (0.20)             | 19 (0.33)             |                    |
| <b><i>Mode of delivery</i></b>                      |                       |                       | 0.290 <sup>a</sup> |
| Vaginal                                             | 38 (0.50)             | 30 (0.53)             |                    |
| C-section                                           | 26 (0.34)             | 12 (0.21)             |                    |
| Missing                                             | 12 (0.16)             | 15 (0.26)             |                    |
| <b><i>Gestational Age (weeks)</i></b>               |                       |                       |                    |
| Mean (range)                                        | 39.28 (35.99 - 42.43) | 39.41 (33.86 - 41.57) | 0.604 <sup>b</sup> |

<sup>a</sup> chi square test p-value

<sup>b</sup> t-test p-value

**Supplementary Table 2.** BLAT results for ZNF300 DMR region. Results include BLAT results for reference sequence in DMR region and for source sequence of 9 450K probes that overlap this region.

| <b>450k Probes Overlapping ZNF300 DMR</b>  |       |       |      |       |          |      |        |           |           |        |
|--------------------------------------------|-------|-------|------|-------|----------|------|--------|-----------|-----------|--------|
| QUERY                                      | SCORE | START | END  | QSIZE | IDENTITY | CHRO | STRAND | START     | END       | SPAN   |
| cg19486756                                 | 50    | 1     | 50   | 50    | 100.00%  | 5    | -      | 150281143 | 150281192 | 50     |
| cg12346881                                 | 50    | 1     | 50   | 50    | 100.00%  | 5    | -      | 150283837 | 150283886 | 50     |
| cg04675542                                 | 50    | 1     | 50   | 50    | 100.00%  | 5    | +      | 150284416 | 150284465 | 50     |
| cg02343823                                 | 50    | 1     | 50   | 50    | 100.00%  | 5    | -      | 150284419 | 150284468 | 50     |
| cg08580836                                 | 50    | 1     | 50   | 50    | 100.00%  | 5    | -      | 150284448 | 150284497 | 50     |
| cg08580836                                 | 32    | 12    | 46   | 50    | 97.10%   | 6    | +      | 1086171   | 1200162   | 113992 |
| cg19014419                                 | 50    | 1     | 50   | 50    | 100.00%  | 5    | +      | 150284456 | 150284505 | 50     |
| cg11291313                                 | 50    | 1     | 50   | 50    | 100.00%  | 5    | -      | 150284482 | 150284531 | 50     |
| cg18237551                                 | 50    | 1     | 50   | 50    | 100.00%  | 5    | -      | 150284552 | 150284601 | 50     |
| cg21228005                                 | 50    | 1     | 50   | 50    | 100.00%  | 5    | +      | 150284748 | 150284797 | 50     |
| <b>chr5:150904274-150905870 under hg38</b> |       |       |      |       |          |      |        |           |           |        |
| QUERY                                      | SCORE | START | END  | QSIZE | IDENTITY | CHRO | STRAND | START     | END       | SPAN   |
| hg38_dna                                   | 1597  | 1     | 1597 | 1597  | 100.00%  | 5    | +      | 150904274 | 150905870 | 1597   |
| hg38_dna                                   | 269   | 463   | 869  | 1597  | 83.50%   | 5    | +      | 150946310 | 150946712 | 403    |
| hg38_dna                                   | 30    | 1170  | 1254 | 1597  | 96.90%   | 1    | +      | 154418956 | 154419188 | 233    |
| hg38_dna                                   | 28    | 1199  | 1244 | 1597  | 66.70%   | 1    | +      | 50659355  | 50659384  | 30     |
| hg38_dna                                   | 26    | 1352  | 1381 | 1597  | 96.50%   | 10   | +      | 461616    | 461660    | 45     |
| hg38_dna                                   | 26    | 1352  | 1381 | 1597  | 96.50%   | 10   | +      | 746531    | 746575    | 45     |
| hg38_dna                                   | 26    | 810   | 836  | 1597  | 100.00%  | 1    | +      | 193931671 | 193932153 | 483    |
| hg38_dna                                   | 23    | 1182  | 1204 | 1597  | 100.00%  | 11   | -      | 12070379  | 12070401  | 23     |
| hg38_dna                                   | 23    | 1510  | 1533 | 1597  | 100.00%  | 1    | +      | 176074721 | 176074745 | 25     |
| hg38_dna                                   | 22    | 405   | 426  | 1597  | 100.00%  | 7    | -      | 37414236  | 37414257  | 22     |
| hg38_dna                                   | 22    | 1182  | 1203 | 1597  | 100.00%  | 12   | -      | 100354201 | 100354222 | 22     |
| hg38_dna                                   | 22    | 244   | 265  | 1597  | 100.00%  | 1    | -      | 22907061  | 22907082  | 22     |
| hg38_dna                                   | 21    | 182   | 202  | 1597  | 100.00%  | 12   | -      | 70460496  | 70460516  | 21     |
| hg38_dna                                   | 20    | 1182  | 1203 | 1597  | 95.50%   | 1    | -      | 29551036  | 29551057  | 22     |

**Supplementary Table 3.** Association metrics for mean ZNF300 methylation levels and potential key confounders.

| <b>Statistical model and confounder name</b>                                                                                                         | <b>Coefficient (95% Confidence Interval)</b> | <b>p-value<sup>a</sup></b> |
|------------------------------------------------------------------------------------------------------------------------------------------------------|----------------------------------------------|----------------------------|
| <i>Gestational Age:</i>                                                                                                                              |                                              |                            |
| $E(M_{\text{DMRmean}}) = \alpha + \beta_1 \text{GestationalAge} + \epsilon$                                                                          | 0.0025 (-0.0260, 0.0309)                     | 0.861                      |
| <i>Genetic ancestry:</i>                                                                                                                             |                                              |                            |
| $E(M_{\text{DMRmean}}) = \alpha + \beta_2 \text{PC1} + \beta_2 \text{PC2} + \beta_3 \text{PC3} + \beta_4 \text{PC4} + \beta_5 \text{PC5} + \epsilon$ |                                              |                            |
| PC1                                                                                                                                                  | -1.52 (-7.95, 4.91)                          | 0.631                      |
| PC2                                                                                                                                                  | -2.09 (-9.05, 4.87)                          | 0.541                      |
| PC3                                                                                                                                                  | 1.29 (-12.34, 14.93)                         | 0.846                      |
| PC4                                                                                                                                                  | -14.80 (-71.92, 42.31)                       | 0.598                      |
| PC5                                                                                                                                                  | -2.73 (-13.71, 8.26)                         | 0.613                      |
| <i>Mode of delivery:</i>                                                                                                                             |                                              |                            |
| $E(M_{\text{DMRmean}}) = \alpha + \beta_1 \text{ModeofDelivery} + \epsilon$                                                                          | -0.032 (-0.165, 0.100)                       | 0.619                      |

PC: principal component

<sup>a</sup>from linear regression of mean across 45 CpG sites in ZNF300 DMR vs gestational age, the first 5 principal components from genotype data, and mode of delivery (vaginal vs C-section).

**Supplementary Table 4.** Candidate differentially methylated regions associated with fetal sex identified in our genome-wide screen of placentae from neurotypical children.

| Chr | Start     | End       | Size (bp) | Mean_Males | Mean_Females | MeanDiff   | fwer  |
|-----|-----------|-----------|-----------|------------|--------------|------------|-------|
| 5   | 150904274 | 150905870 | 1597      | 0.53969502 | 0.389863571  | 0.14983145 | 0.015 |
| 6   | 102904326 | 102905438 | 1113      | 0.36358626 | 0.480718729  | -0.1171325 | 0.192 |
| 1   | 26817250  | 26817668  | 419       | 0.46238026 | 0.721890005  | -0.2595097 | 0.319 |
| 8   | 3182959   | 3183686   | 728       | 0.29756636 | 0.394339137  | -0.0967728 | 0.359 |
| 13  | 89087754  | 89088647  | 894       | 0.39849116 | 0.510989959  | -0.1124988 | 0.371 |
| 22  | 33014021  | 33014861  | 841       | 0.1672423  | 0.314354614  | -0.1471123 | 0.397 |
| 21  | 21024602  | 21025439  | 838       | 0.41402048 | 0.475943936  | -0.0619235 | 0.454 |
| 5   | 62804346  | 62805039  | 694       | 0.56725629 | 0.412467734  | 0.15478855 | 0.504 |
| 7   | 47052929  | 47053330  | 402       | 0.25084429 | 0.405674256  | -0.15483   | 0.524 |
| 21  | 21019803  | 21020643  | 841       | 0.36591433 | 0.416062629  | -0.0501483 | 0.533 |
| 4   | 37001712  | 37002384  | 673       | 0.23213303 | 0.321256093  | -0.0891231 | 0.672 |
| 18  | 30175567  | 30176200  | 634       | 0.2225856  | 0.366395684  | -0.1438101 | 0.739 |
| 4   | 25506054  | 25506453  | 400       | 0.29781156 | 0.475505546  | -0.177694  | 0.746 |
| 11  | 34346080  | 34346768  | 689       | 0.74035313 | 0.625274156  | 0.11507897 | 0.803 |
| 4   | 56433717  | 56434325  | 609       | 0.62517709 | 0.481522305  | 0.14365478 | 0.823 |
| 9   | 16869185  | 16869742  | 558       | 0.44334902 | 0.286416548  | 0.15693247 | 0.87  |
| 17  | 30823009  | 30823535  | 527       | 0.58974505 | 0.438174901  | 0.15157015 | 0.891 |
| 9   | 63859185  | 63859620  | 436       | 0.18865911 | 0.291493489  | -0.1028344 | 0.904 |
| 3   | 33114982  | 33115497  | 516       | 0.59630619 | 0.441793945  | 0.15451224 | 0.918 |
| 7   | 25743955  | 25744332  | 378       | 0.22377351 | 0.351845682  | -0.1280722 | 0.931 |
| 3   | 196163915 | 196164420 | 506       | 0.22882054 | 0.326757973  | -0.0979374 | 0.946 |
| 8   | 4313287   | 4313811   | 525       | 0.40328952 | 0.450709515  | -0.04742   | 0.948 |
| 2   | 60883035  | 60883593  | 559       | 0.40270084 | 0.240521326  | 0.16217951 | 0.955 |
| 7   | 43113076  | 43113374  | 299       | 0.35889834 | 0.213780459  | 0.14511788 | 0.956 |
| 9   | 5683764   | 5684207   | 444       | 0.66013324 | 0.794337795  | -0.1342046 | 0.961 |
| 17  | 82228306  | 82228514  | 209       | 0.56440784 | 0.404294969  | 0.16011288 | 0.964 |
| 17  | 503023    | 503261    | 239       | 0.31963847 | 0.468408437  | -0.14877   | 0.972 |
| 17  | 80832988  | 80833421  | 434       | 0.49849612 | 0.376316696  | 0.12217943 | 0.973 |
| 1   | 112957285 | 112957782 | 498       | 0.62968011 | 0.512139614  | 0.1175405  | 0.976 |
| 8   | 4643964   | 4644467   | 504       | 0.37603323 | 0.431062148  | -0.0550289 | 0.976 |
| 22  | 47631852  | 47632172  | 321       | 0.29063687 | 0.418916495  | -0.1282796 | 0.977 |
| 11  | 26114759  | 26115252  | 494       | 0.55515393 | 0.625585307  | -0.0704314 | 0.977 |
| 2   | 55442125  | 55442427  | 303       | 0.65478068 | 0.785600569  | -0.1308199 | 0.979 |
| 13  | 96947238  | 96947640  | 403       | 0.56990033 | 0.45208243   | 0.1178179  | 0.982 |
| 2   | 43218773  | 43219225  | 453       | 0.6417339  | 0.515743148  | 0.12599076 | 0.987 |
| 11  | 118788960 | 118789320 | 361       | 0.57662116 | 0.431160296  | 0.14546086 | 0.988 |
| 11  | 748309    | 748750    | 442       | 0.56287014 | 0.425001035  | 0.13786911 | 0.989 |
| 19  | 52536440  | 52536743  | 304       | 0.15673983 | 0.341667011  | -0.1849272 | 0.991 |

|    |           |           |     |            |             |            |       |
|----|-----------|-----------|-----|------------|-------------|------------|-------|
| 11 | 23730361  | 23730589  | 229 | 0.3203217  | 0.44812786  | -0.1278062 | 0.995 |
| 21 | 10119719  | 10119962  | 244 | 0.12107314 | 0.191750242 | -0.0706771 | 0.997 |
| 21 | 20997548  | 20997812  | 265 | 0.14630042 | 0.220026114 | -0.0737257 | 0.997 |
| 7  | 30596194  | 30596560  | 367 | 0.31803916 | 0.194787724 | 0.12325144 | 0.997 |
| 18 | 49017485  | 49017854  | 370 | 0.35070831 | 0.478526163 | -0.1278179 | 0.997 |
| 5  | 150906191 | 150906538 | 348 | 0.59324673 | 0.487077205 | 0.10616953 | 0.998 |
| 22 | 10961644  | 10961748  | 105 | 0.2034263  | 0.282579507 | -0.0791532 | 1     |
| 2  | 226835303 | 226835549 | 247 | 0.2530793  | 0.399235894 | -0.1461566 | 1     |
| 4  | 6953213   | 6953403   | 191 | 0.79051205 | 0.656509643 | 0.1340024  | 1     |
| 8  | 6523620   | 6523876   | 257 | 0.57330059 | 0.738626583 | -0.165326  | 1     |
| 12 | 68747362  | 68747557  | 196 | 0.47457651 | 0.358629776 | 0.11594673 | 1     |
| 11 | 95037869  | 95037965  | 97  | 0.15420386 | 0.27446568  | -0.1202618 | 1     |
| 7  | 24977573  | 24977748  | 176 | 0.77516372 | 0.626604073 | 0.14855964 | 1     |
| 6  | 48069444  | 48069679  | 236 | 0.4746624  | 0.345747952 | 0.12891444 | 1     |
| 1  | 26863968  | 26864266  | 299 | 0.61154535 | 0.446746529 | 0.16479882 | 1     |
| 22 | 21569064  | 21569310  | 247 | 0.52440884 | 0.385207195 | 0.13920165 | 1     |
| 9  | 63708818  | 63708951  | 134 | 0.12622869 | 0.237047741 | -0.1108191 | 1     |
| 5  | 39787881  | 39788013  | 133 | 0.5236956  | 0.656046628 | -0.132351  | 1     |
| 1  | 27552048  | 27552178  | 131 | 0.66701315 | 0.776846896 | -0.1098338 | 1     |
| 20 | 63641308  | 63641388  | 81  | 0.44121346 | 0.26799749  | 0.17321597 | 1     |
| 1  | 156436807 | 156436972 | 166 | 0.44166161 | 0.302576825 | 0.13908479 | 1     |
| 1  | 44794325  | 44794593  | 269 | 0.63957297 | 0.501941886 | 0.13763109 | 1     |
| 3  | 128490875 | 128491063 | 189 | 0.52224952 | 0.340747385 | 0.18150214 | 1     |
| 1  | 148844264 | 148844375 | 112 | 0.18319096 | 0.368005892 | -0.1848149 | 1     |
| 18 | 12078     | 12161     | 84  | 0.43858114 | 0.56079891  | -0.1222178 | 1     |
| 10 | 117373474 | 117373586 | 113 | 0.66364214 | 0.534971421 | 0.12867071 | 1     |
| 2  | 25216986  | 25217110  | 125 | 0.29588857 | 0.396137034 | -0.1002485 | 1     |
| 9  | 133819210 | 133819365 | 156 | 0.46475588 | 0.559329468 | -0.0945736 | 1     |
| 17 | 36658370  | 36658501  | 132 | 0.50973198 | 0.3657855   | 0.14394648 | 1     |
| 22 | 11618202  | 11618321  | 120 | 0.49343217 | 0.606624468 | -0.1131923 | 1     |
| 7  | 72880605  | 72880834  | 230 | 0.69341631 | 0.552380268 | 0.14103604 | 1     |
| 3  | 157542604 | 157542648 | 45  | 0.2755862  | 0.383824841 | -0.1082386 | 1     |
| 3  | 46845138  | 46845337  | 200 | 0.48711593 | 0.374539782 | 0.11257615 | 1     |
| 7  | 151460861 | 151461128 | 268 | 0.51639096 | 0.406896982 | 0.10949398 | 1     |
| 3  | 170909038 | 170909191 | 154 | 0.33495208 | 0.440143312 | -0.1051912 | 1     |
| 7  | 44846295  | 44846413  | 119 | 0.57697319 | 0.458717672 | 0.11825552 | 1     |
| 9  | 136110285 | 136110367 | 83  | 0.68297503 | 0.515186473 | 0.16778856 | 1     |
| 2  | 3528256   | 3528357   | 102 | 0.71419382 | 0.555728818 | 0.158465   | 1     |
| 3  | 150703021 | 150703172 | 152 | 0.62033306 | 0.498521837 | 0.12181123 | 1     |
| 3  | 195659311 | 195659409 | 99  | 0.67656181 | 0.547707109 | 0.1288547  | 1     |
| 9  | 42636362  | 42636446  | 85  | 0.36246595 | 0.499199983 | -0.136734  | 1     |

|    |           |           |     |            |             |            |   |
|----|-----------|-----------|-----|------------|-------------|------------|---|
| 1  | 51877102  | 51877331  | 230 | 0.6328365  | 0.513548997 | 0.1192875  | 1 |
| 9  | 66269167  | 66269268  | 102 | 0.43975249 | 0.312889684 | 0.12686281 | 1 |
| 14 | 18966635  | 18966714  | 80  | 0.41976397 | 0.558251667 | -0.1384877 | 1 |
| 11 | 95037404  | 95037492  | 89  | 0.13404375 | 0.251162466 | -0.1171187 | 1 |
| 19 | 2428394   | 2428527   | 134 | 0.55021488 | 0.419253284 | 0.1309616  | 1 |
| 1  | 9183468   | 9183541   | 74  | 0.55327814 | 0.435611897 | 0.11766624 | 1 |
| 6  | 158939841 | 158939952 | 112 | 0.63060994 | 0.499820474 | 0.13078946 | 1 |
| 11 | 5937993   | 5938095   | 103 | 0.28469028 | 0.385370379 | -0.1006801 | 1 |
| 7  | 155205469 | 155205605 | 137 | 0.42057054 | 0.254319313 | 0.16625123 | 1 |
| 1  | 246794195 | 246794381 | 187 | 0.51090202 | 0.384268641 | 0.12663338 | 1 |
| 3  | 9648787   | 9648886   | 100 | 0.47914683 | 0.594951797 | -0.115805  | 1 |
| 7  | 91881387  | 91881554  | 168 | 0.29518391 | 0.426140411 | -0.1309565 | 1 |
| 1  | 3538797   | 3538882   | 86  | 0.47672223 | 0.558948672 | -0.0822264 | 1 |
| 16 | 69425919  | 69426137  | 219 | 0.77196256 | 0.624085947 | 0.14787661 | 1 |
| 14 | 59951529  | 59951675  | 147 | 0.30353118 | 0.482298425 | -0.1787672 | 1 |
| 1  | 66931569  | 66931885  | 317 | 0.39192873 | 0.261945555 | 0.12998318 | 1 |
| 2  | 74530953  | 74531109  | 157 | 0.53756719 | 0.401683879 | 0.13588331 | 1 |
| 3  | 24522364  | 24522452  | 89  | 0.50086357 | 0.385242479 | 0.11562109 | 1 |
| 6  | 27630425  | 27630482  | 58  | 0.4420674  | 0.580163934 | -0.1380965 | 1 |
| 16 | 68357089  | 68357286  | 198 | 0.69216437 | 0.789533419 | -0.097369  | 1 |
| 16 | 71896786  | 71896916  | 131 | 0.58803064 | 0.472353201 | 0.11567744 | 1 |
| 20 | 38599875  | 38599894  | 20  | 0.46951431 | 0.587585335 | -0.118071  | 1 |
| 16 | 75624202  | 75624266  | 65  | 0.29593336 | 0.420665851 | -0.1247325 | 1 |
| 5  | 95960156  | 95960220  | 65  | 0.6281615  | 0.513862969 | 0.11429853 | 1 |
| 5  | 178087094 | 178087146 | 53  | 0.63132238 | 0.52194273  | 0.10937965 | 1 |
| 15 | 73221239  | 73221312  | 74  | 0.54046885 | 0.635315408 | -0.0948466 | 1 |
| 6  | 33453156  | 33453403  | 248 | 0.64653333 | 0.471606606 | 0.17492672 | 1 |
| 1  | 143331925 | 143332013 | 89  | 0.51384825 | 0.766218557 | -0.2523703 | 1 |
| 3  | 9916172   | 9916363   | 192 | 0.54078141 | 0.408062861 | 0.13271855 | 1 |
| 6  | 7313845   | 7313973   | 129 | 0.20787541 | 0.316457052 | -0.1085816 | 1 |
| 15 | 74907469  | 74907697  | 229 | 0.61951186 | 0.505559664 | 0.1139522  | 1 |
| 21 | 10274090  | 10274234  | 145 | 0.62722703 | 0.424985944 | 0.20224108 | 1 |
| 7  | 44574706  | 44574745  | 40  | 0.41166986 | 0.530819084 | -0.1191492 | 1 |
| 1  | 32499813  | 32499843  | 31  | 0.47055569 | 0.573593885 | -0.1030382 | 1 |
| 1  | 91884479  | 91884576  | 98  | 0.54902255 | 0.425348841 | 0.12367371 | 1 |
| 4  | 37669799  | 37669900  | 102 | 0.57870869 | 0.425658962 | 0.15304973 | 1 |
| 15 | 55589346  | 55589409  | 64  | 0.40191328 | 0.286285847 | 0.11562744 | 1 |
| 14 | 59951010  | 59951115  | 106 | 0.40955544 | 0.610216582 | -0.2006611 | 1 |
| 10 | 131972756 | 131972817 | 62  | 0.73230174 | 0.617520246 | 0.11478149 | 1 |
| 16 | 77527     | 77580     | 54  | 0.41594531 | 0.292566949 | 0.12337836 | 1 |
| 1  | 52663482  | 52663498  | 17  | 0.66321365 | 0.556284149 | 0.1069295  | 1 |

|    |           |           |     |            |             |            |   |
|----|-----------|-----------|-----|------------|-------------|------------|---|
| 16 | 33516339  | 33516408  | 70  | 0.21562682 | 0.327995265 | -0.1123684 | 1 |
| 1  | 144556793 | 144557065 | 273 | 0.50672015 | 0.663920838 | -0.1572007 | 1 |
| 1  | 246793605 | 246793764 | 160 | 0.57924049 | 0.451079821 | 0.12816067 | 1 |
| 6  | 31701851  | 31702125  | 275 | 0.46163439 | 0.351559334 | 0.11007505 | 1 |
| 19 | 39406116  | 39406142  | 27  | 0.54559645 | 0.397974967 | 0.14762149 | 1 |
| 3  | 25662744  | 25662866  | 123 | 0.45914893 | 0.344636435 | 0.11451249 | 1 |
| 4  | 17811924  | 17812185  | 262 | 0.64039078 | 0.510493737 | 0.12989705 | 1 |
| 2  | 233867831 | 233867859 | 29  | 0.38082591 | 0.497871826 | -0.1170459 | 1 |
| 6  | 116370081 | 116370221 | 141 | 0.60289399 | 0.487620281 | 0.11527371 | 1 |
| 19 | 54188248  | 54188433  | 186 | 0.55829196 | 0.427362155 | 0.1309298  | 1 |
| 1  | 54490242  | 54490348  | 107 | 0.56234151 | 0.431485684 | 0.13085582 | 1 |
| 5  | 175968949 | 175969073 | 125 | 0.69677009 | 0.574684422 | 0.12208567 | 1 |
| 1  | 148150643 | 148150756 | 114 | 0.50371152 | 0.389486313 | 0.11422521 | 1 |
| 3  | 61637971  | 61638111  | 141 | 0.67011876 | 0.54714846  | 0.1229703  | 1 |
| 11 | 65541703  | 65541746  | 44  | 0.23444536 | 0.336844875 | -0.1023995 | 1 |
| 1  | 40980935  | 40980998  | 64  | 0.64091945 | 0.525332982 | 0.11558647 | 1 |
| 19 | 33195448  | 33195484  | 37  | 0.4894217  | 0.361151367 | 0.12827033 | 1 |
| 7  | 3914236   | 3914329   | 94  | 0.40727373 | 0.494978403 | -0.0877047 | 1 |
| 1  | 17683690  | 17683702  | 13  | 0.48889576 | 0.561590693 | -0.0726949 | 1 |
| 4  | 109561771 | 109561817 | 47  | 0.42410893 | 0.304901868 | 0.11920707 | 1 |
| 21 | 5156545   | 5156548   | 4   | 0.96610397 | 0.765822717 | 0.20028126 | 1 |
| 5  | 177517878 | 177517889 | 12  | 0.64105401 | 0.509999735 | 0.13105427 | 1 |
| 12 | 47904075  | 47904079  | 5   | 0.46911267 | 0.338785423 | 0.13032725 | 1 |
| 17 | 26593455  | 26593488  | 34  | 0.46786941 | 0.593773318 | -0.1259039 | 1 |
| 21 | 21019221  | 21019408  | 188 | 0.3442985  | 0.376214985 | -0.0319165 | 1 |
| 1  | 148246176 | 148246207 | 32  | 0.57935934 | 0.718871882 | -0.1395125 | 1 |
| 6  | 27632298  | 27632400  | 103 | 0.66129806 | 0.552199735 | 0.10909833 | 1 |
| 19 | 43625504  | 43625562  | 59  | 0.26881748 | 0.408809886 | -0.1399924 | 1 |
| 10 | 46378876  | 46378915  | 40  | 0.58147216 | 0.445863148 | 0.13560901 | 1 |
| 14 | 59950659  | 59950706  | 48  | 0.49916485 | 0.657172098 | -0.1580072 | 1 |
| 5  | 178357743 | 178357761 | 19  | 0.4577331  | 0.326923447 | 0.13080966 | 1 |
| 17 | 83052683  | 83052706  | 24  | 0.69941798 | 0.574889102 | 0.12452887 | 1 |
| 10 | 80356201  | 80356313  | 113 | 0.49187432 | 0.377029589 | 0.11484473 | 1 |
| 1  | 93511123  | 93511212  | 90  | 0.41047113 | 0.51996816  | -0.109497  | 1 |
| 1  | 35030799  | 35030804  | 6   | 0.59654116 | 0.488844218 | 0.10769694 | 1 |
| 1  | 26827742  | 26827791  | 50  | 0.52751101 | 0.416573137 | 0.11093787 | 1 |
| 12 | 51024867  | 51024885  | 19  | 0.42176187 | 0.297616293 | 0.12414558 | 1 |
| 1  | 224214105 | 224214193 | 89  | 0.55652502 | 0.438119016 | 0.11840601 | 1 |
| 19 | 48752175  | 48752198  | 24  | 0.46926756 | 0.340727212 | 0.12854035 | 1 |
| 6  | 73452503  | 73452508  | 6   | 0.3472082  | 0.248373512 | 0.09883469 | 1 |
| 3  | 172038972 | 172038989 | 18  | 0.46459088 | 0.563677592 | -0.0990867 | 1 |



|    |           |           |     |            |             |            |   |
|----|-----------|-----------|-----|------------|-------------|------------|---|
| 10 | 14579108  | 14579232  | 125 | 0.47160821 | 0.346163131 | 0.12544508 | 1 |
| 9  | 129738255 | 129738264 | 10  | 0.71937816 | 0.577432802 | 0.14194536 | 1 |
| 16 | 14909925  | 14909925  | 1   | 0.76295957 | 0.493747879 | 0.26921169 | 1 |
| 5  | 176239941 | 176239941 | 1   | 0.40962175 | 0.609286272 | -0.1996645 | 1 |
| 3  | 141488485 | 141488485 | 1   | 0.48767862 | 0.343482291 | 0.14419633 | 1 |
| 14 | 64896891  | 64896891  | 1   | 0.60252301 | 0.762276118 | -0.1597531 | 1 |
| 7  | 155345599 | 155345599 | 1   | 0.58876891 | 0.421927371 | 0.16684154 | 1 |
| 2  | 42013609  | 42013609  | 1   | 0.62957903 | 0.762344137 | -0.1327651 | 1 |
| 7  | 102573673 | 102573673 | 1   | 0.52415798 | 0.351503911 | 0.17265407 | 1 |
| 14 | 56669487  | 56669487  | 1   | 0.71694676 | 0.557403479 | 0.15954328 | 1 |
| 22 | 42555032  | 42555032  | 1   | 0.48484988 | 0.623788462 | -0.1389386 | 1 |
| 7  | 73157667  | 73157667  | 1   | 0.48097514 | 0.306001796 | 0.17497335 | 1 |
| 12 | 48106738  | 48106738  | 1   | 0.28632274 | 0.423368207 | -0.1370455 | 1 |
| 9  | 41360138  | 41360138  | 1   | 0.60075944 | 0.742406304 | -0.1416469 | 1 |
| 22 | 10571277  | 10571277  | 1   | 0.07631221 | 0.226366377 | -0.1500542 | 1 |
| 4  | 138562248 | 138562248 | 1   | 0.58136789 | 0.700456576 | -0.1190887 | 1 |
| 7  | 44122997  | 44122997  | 1   | 0.46375832 | 0.34881195  | 0.11494637 | 1 |
| 14 | 56668599  | 56668599  | 1   | 0.69761312 | 0.545062483 | 0.15255064 | 1 |
| 15 | 31390805  | 31390805  | 1   | 0.6136945  | 0.725216419 | -0.1115219 | 1 |
| 5  | 141479035 | 141479035 | 1   | 0.34474105 | 0.218042163 | 0.12669888 | 1 |
| 8  | 132774577 | 132774577 | 1   | 0.57824679 | 0.694545031 | -0.1162982 | 1 |
| 1  | 144811640 | 144811640 | 1   | 0.81487167 | 0.611641586 | 0.20323008 | 1 |
| 20 | 3172769   | 3172769   | 1   | 0.56526936 | 0.417757099 | 0.14751226 | 1 |
| 2  | 60884087  | 60884087  | 1   | 0.71727167 | 0.591259503 | 0.12601217 | 1 |
| 8  | 60516096  | 60516096  | 1   | 0.69144685 | 0.568598516 | 0.12284833 | 1 |
| 6  | 125987445 | 125987445 | 1   | 0.63931903 | 0.528588084 | 0.11073095 | 1 |
| 16 | 22161028  | 22161028  | 1   | 0.55505067 | 0.668965798 | -0.1139151 | 1 |
| 16 | 67561316  | 67561316  | 1   | 0.75570437 | 0.630246893 | 0.12545748 | 1 |
| 15 | 32535114  | 32535114  | 1   | 0.74831672 | 0.607058895 | 0.14125783 | 1 |
| 10 | 47301071  | 47301071  | 1   | 0.46625522 | 0.337512243 | 0.12874298 | 1 |
| 3  | 185253475 | 185253475 | 1   | 0.34076158 | 0.228240374 | 0.1125212  | 1 |
| 1  | 149814128 | 149814128 | 1   | 0.66076446 | 0.555724691 | 0.10503977 | 1 |
| 9  | 35829998  | 35829998  | 1   | 0.65957111 | 0.544194128 | 0.11537698 | 1 |
| 9  | 26945818  | 26945818  | 1   | 0.41827689 | 0.294387977 | 0.12388891 | 1 |
| 2  | 91627174  | 91627174  | 1   | 0.40569202 | 0.510175384 | -0.1044834 | 1 |
| 1  | 149102458 | 149102458 | 1   | 0.2077392  | 0.095397407 | 0.1123418  | 1 |
| 6  | 69866138  | 69866138  | 1   | 0.26873121 | 0.376107086 | -0.1073759 | 1 |
| 9  | 4986535   | 4986535   | 1   | 0.55584205 | 0.447691365 | 0.10815069 | 1 |
| 11 | 3839901   | 3839901   | 1   | 0.61323566 | 0.46494706  | 0.1482886  | 1 |
| 17 | 42387217  | 42387217  | 1   | 0.36227666 | 0.248823696 | 0.11345297 | 1 |
| 6  | 691690    | 691690    | 1   | 0.7512944  | 0.650367472 | 0.10092693 | 1 |

|    |           |           |   |            |             |            |   |
|----|-----------|-----------|---|------------|-------------|------------|---|
| 6  | 128521514 | 128521514 | 1 | 0.62356283 | 0.519314497 | 0.10424833 | 1 |
| 22 | 50807836  | 50807836  | 1 | 0.16221806 | 0.149821874 | 0.01239618 | 1 |
| 2  | 126181612 | 126181612 | 1 | 0.67824842 | 0.549772994 | 0.12847542 | 1 |
| 3  | 128075246 | 128075246 | 1 | 0.32231602 | 0.218337287 | 0.10397873 | 1 |
| 1  | 40664754  | 40664754  | 1 | 0.50203857 | 0.622019586 | -0.119981  | 1 |
| 6  | 2952096   | 2952096   | 1 | 0.7660068  | 0.650901061 | 0.11510574 | 1 |
| 15 | 65516307  | 65516307  | 1 | 0.57163284 | 0.467732622 | 0.10390022 | 1 |
| 2  | 169325251 | 169325251 | 1 | 0.42197327 | 0.522301529 | -0.1003283 | 1 |
| 2  | 42013064  | 42013064  | 1 | 0.68388401 | 0.787728952 | -0.1038449 | 1 |
| 21 | 44013979  | 44013979  | 1 | 0.63639722 | 0.513152493 | 0.12324472 | 1 |
| 20 | 38462914  | 38462914  | 1 | 0.2362895  | 0.413050671 | -0.1767612 | 1 |
| 2  | 42974439  | 42974439  | 1 | 0.67467076 | 0.560916823 | 0.11375394 | 1 |
| 14 | 70254233  | 70254233  | 1 | 0.66226424 | 0.765156671 | -0.1028924 | 1 |
| 17 | 51154571  | 51154571  | 1 | 0.55139713 | 0.444112232 | 0.1072849  | 1 |
| 6  | 27471878  | 27471878  | 1 | 0.40566709 | 0.305311989 | 0.1003551  | 1 |
| 19 | 3762180   | 3762180   | 1 | 0.45244129 | 0.327413649 | 0.12502764 | 1 |
| 1  | 235865757 | 235865757 | 1 | 0.45189121 | 0.353956541 | 0.09793467 | 1 |
| 3  | 134794466 | 134794466 | 1 | 0.19410446 | 0.266266354 | -0.0721619 | 1 |
| 3  | 136750396 | 136750396 | 1 | 0.52884958 | 0.427662684 | 0.1011869  | 1 |
| 2  | 102737500 | 102737500 | 1 | 0.39819639 | 0.2828347   | 0.11536169 | 1 |
| 11 | 100481801 | 100481801 | 1 | 0.57406559 | 0.652814729 | -0.0787491 | 1 |
| 6  | 79948856  | 79948856  | 1 | 0.34863754 | 0.248128244 | 0.1005093  | 1 |
| 16 | 67659354  | 67659354  | 1 | 0.72673198 | 0.615644515 | 0.11108746 | 1 |
| 20 | 25984970  | 25984970  | 1 | 0.22554291 | 0.349131263 | -0.1235884 | 1 |
| 13 | 89162841  | 89162841  | 1 | 0.27718697 | 0.369332381 | -0.0921454 | 1 |
| 1  | 29479899  | 29479899  | 1 | 0.3808028  | 0.48124185  | -0.1004391 | 1 |
| 16 | 33516325  | 33516325  | 1 | 0.2331225  | 0.343133687 | -0.1100112 | 1 |
| 16 | 33516312  | 33516312  | 1 | 0.23897963 | 0.34769418  | -0.1087145 | 1 |
| 13 | 109141156 | 109141156 | 1 | 0.51847749 | 0.662891152 | -0.1444137 | 1 |
| 1  | 152037550 | 152037550 | 1 | 0.65057056 | 0.545019567 | 0.10555099 | 1 |
| 13 | 89162879  | 89162879  | 1 | 0.27518599 | 0.366168118 | -0.0909821 | 1 |
| 3  | 129427888 | 129427888 | 1 | 0.57537001 | 0.467229106 | 0.1081409  | 1 |

FWER: family wise error rate

<sup>a</sup>Mean difference value ('MeanDiff') calculated as (males –females methylation) across all measured positions in DMR region.

**Supplementary Table 5.** Summary of all data sets (discovery and replication) used in replication analyses.

| <b>Dataset Name</b>                | <b>Tissue Type</b> | <b>Measurement Platform</b> | <b>Cohort/GEO ID</b> | <b>N<sub>total</sub></b> | <b>N<sub>Males</sub></b> | <b>N<sub>Females</sub></b> |
|------------------------------------|--------------------|-----------------------------|----------------------|--------------------------|--------------------------|----------------------------|
| <b><i>Discovery:</i></b>           |                    |                             |                      |                          |                          |                            |
| <i>EARLI</i>                       | Placenta           | WGBS                        | EARLI                | 37                       | 17                       | 20                         |
| <b><i>Replication:</i></b>         |                    |                             |                      |                          |                          |                            |
| <i>PR 1</i>                        | Placenta           | WGBS                        | EARLI                | 50                       | 26                       | 24                         |
| <i>PR 2</i>                        | Placenta           | 450K                        | GSE75248             | 324                      | 159                      | 165                        |
| <i>PR 3</i>                        | Placenta           | 450K                        | GSE71678             | 342                      | 184                      | 158                        |
| <i>PR 4</i>                        | Placenta           | 450K                        | GSE75196             | 24                       | 11                       | 13                         |
| <i>PR 5</i>                        | Placenta           | 450K                        | Roifman et al. 2016  | 16                       | 10                       | 6                          |
| <i>PR 6</i>                        | Placenta           | 450K                        | GSE57767             | 12                       | 6                        | 6                          |
| <i>PR 7</i>                        | Placenta           | 450K                        | GSE93208             | 19                       | 9                        | 10                         |
| <b><i>Specificity Tissue 1</i></b> | Cord Blood         | 450K                        | EARLI                | 223                      | 114                      | 109                        |
| <b><i>Specificity Tissue 2</i></b> | Fetal Brain        | 450K                        | GSE58885             | 179                      | 100                      | 79                         |
| <b><i>Specificity Tissue 3</i></b> | Peripheral blood   | 450K                        | SEED                 | 970                      | 643                      | 327                        |

EARLI, Early Autism Risk Longitudinal Investigation; PR, placental replication; WGBS, whole genome bisulfite sequencing; 450K, Illumina 450K Methylation BeadChip

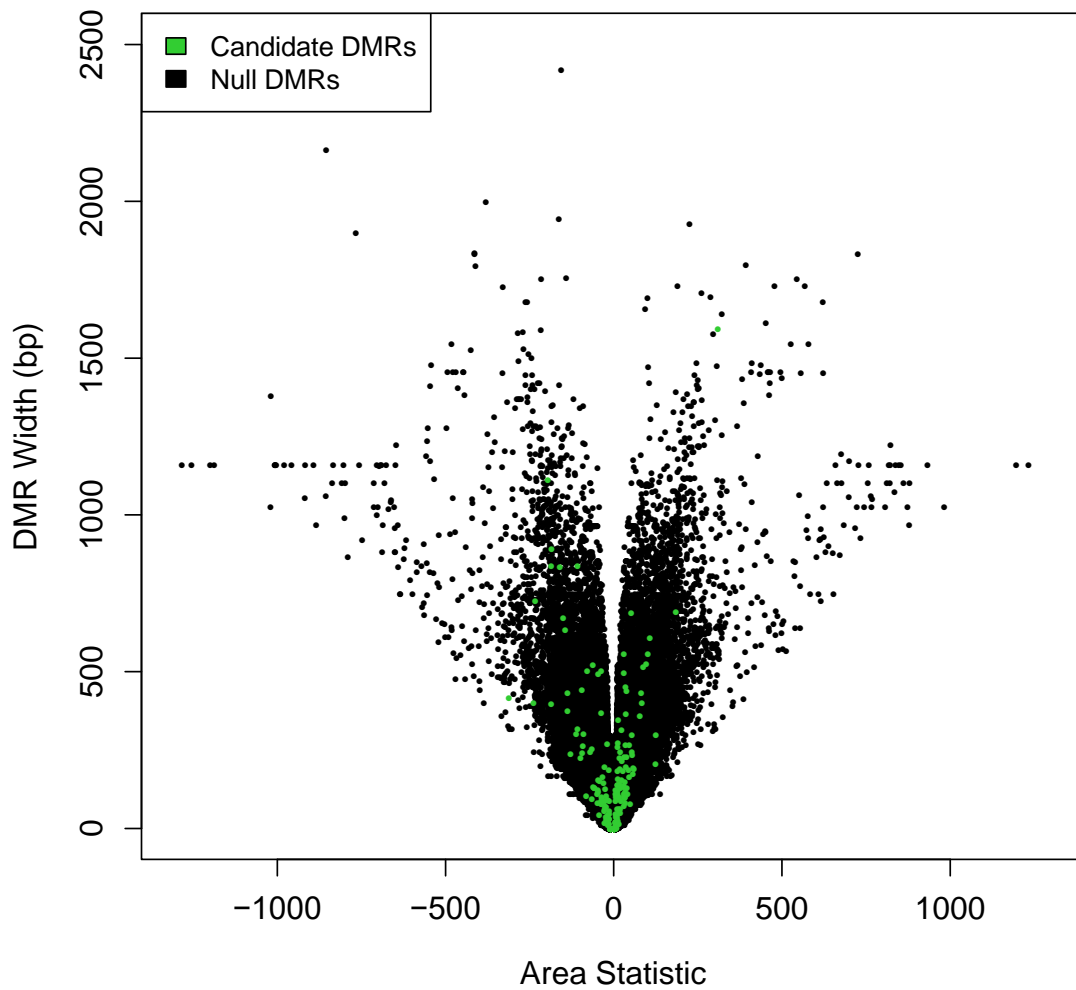

**Supplementary Figure S1:** Genome-wide results for identification of differentially methylated regions in placenta associated with fetal sex. Y-axis depicts width (bp) of null (black dots) or candidate (green dots) DMRs identified via BSmooth. X-axis depicts area statistics (sum of t-statistics in DMR) of null or candidate DMRs. Null DMRs are those generated across 1000 permutations.

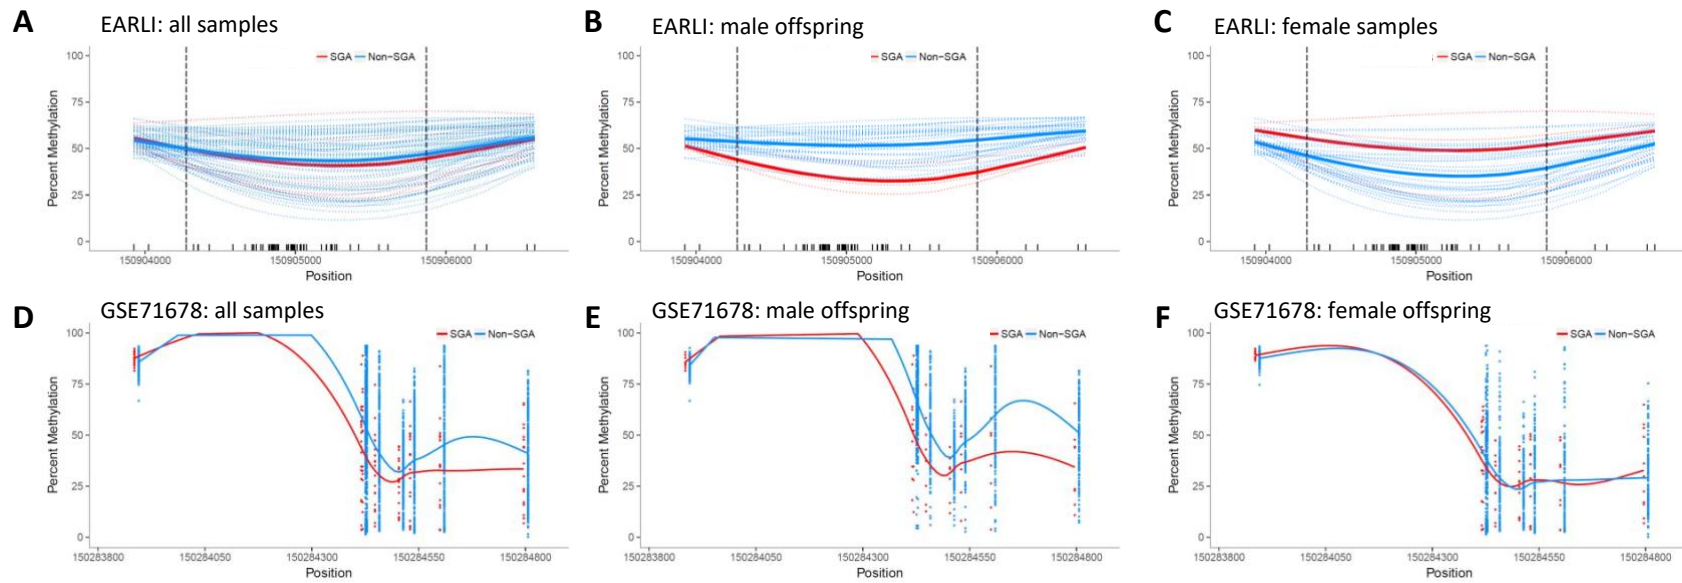

**Supplementary Figure 2: Inverse relationship between *ZNF300* promoter methylation and small for gestational age (SGA) between males and females.** Percent methylation (y-axis) vs genomic position (x-axis). Small for gestational age (SGA) is denoted in red and non-SGA in blue. EARLI study placenta whole genome bisulfite sequencing data (WGBS) from **A**, all samples (n=74); **B**, male offspring (n=34); **C**, female offspring (n=34). Illumina 450K DNA methylation data from replication set 3 (GSE71678) for **D**, all samples (n=338); **E**, male offspring (n=180); **F**, female offspring (n=158)

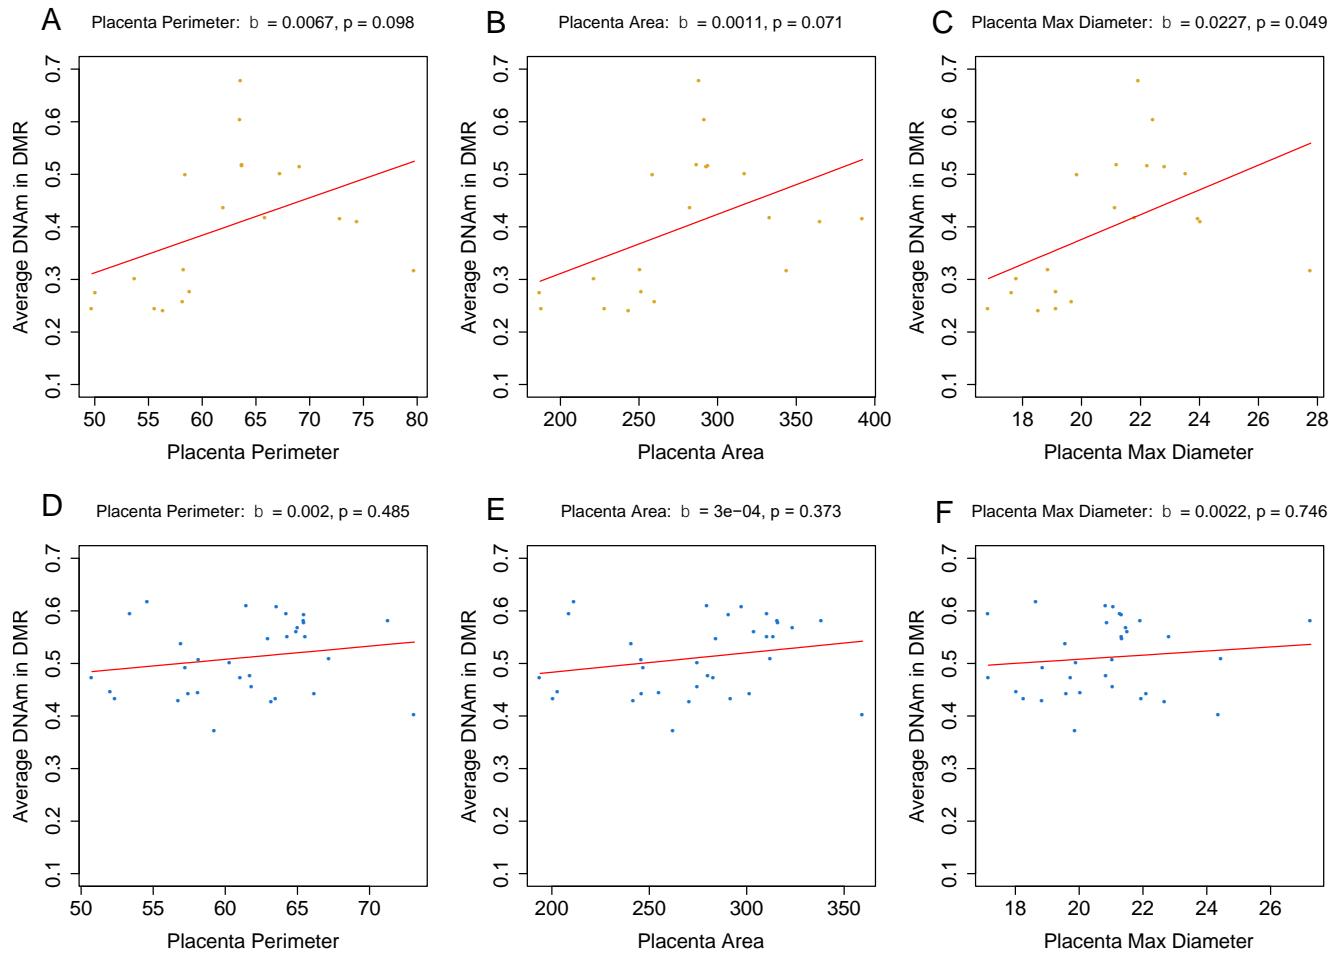

**Supplementary Figure 3: DNA methylation associations with placenta morphological features at *ZNF300* locus are observed in females but not males.** Mean methylation levels in DMR (y-axis) vs. placental perimeter (A,D), area (B,E), and maximum diameter (C,F), on the x-axis. P-values shown are for the regression of average methylation in the DMR onto each placental feature, adjusted for gestational age and FPR. A-C, among females (n=20; yellow points); D-F, among males (n=33; blue points).

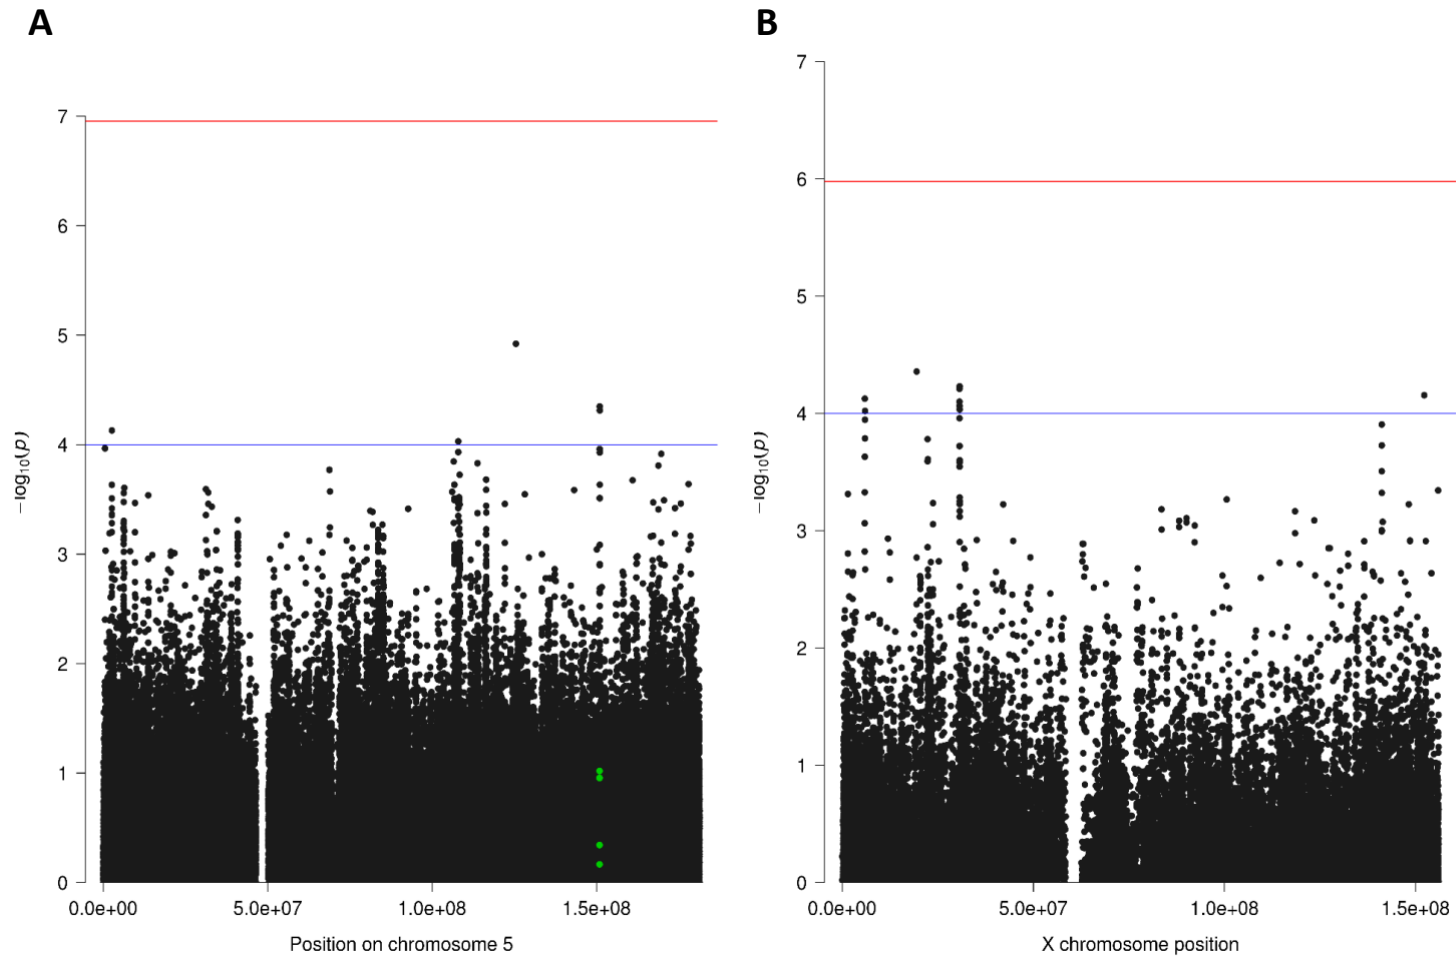

**Supplementary Figure 4: Manhattan plots showing SNP associations with DNA methylation at *ZNF300*.** **A**, chromosome 5 SNPs with green dots indicating SNPs that are located within the *ZNF300* differentially methylated region; **B**, SNPs on chromosome X that showed suggestive associations with methylation at *ZNF300*, in *trans*

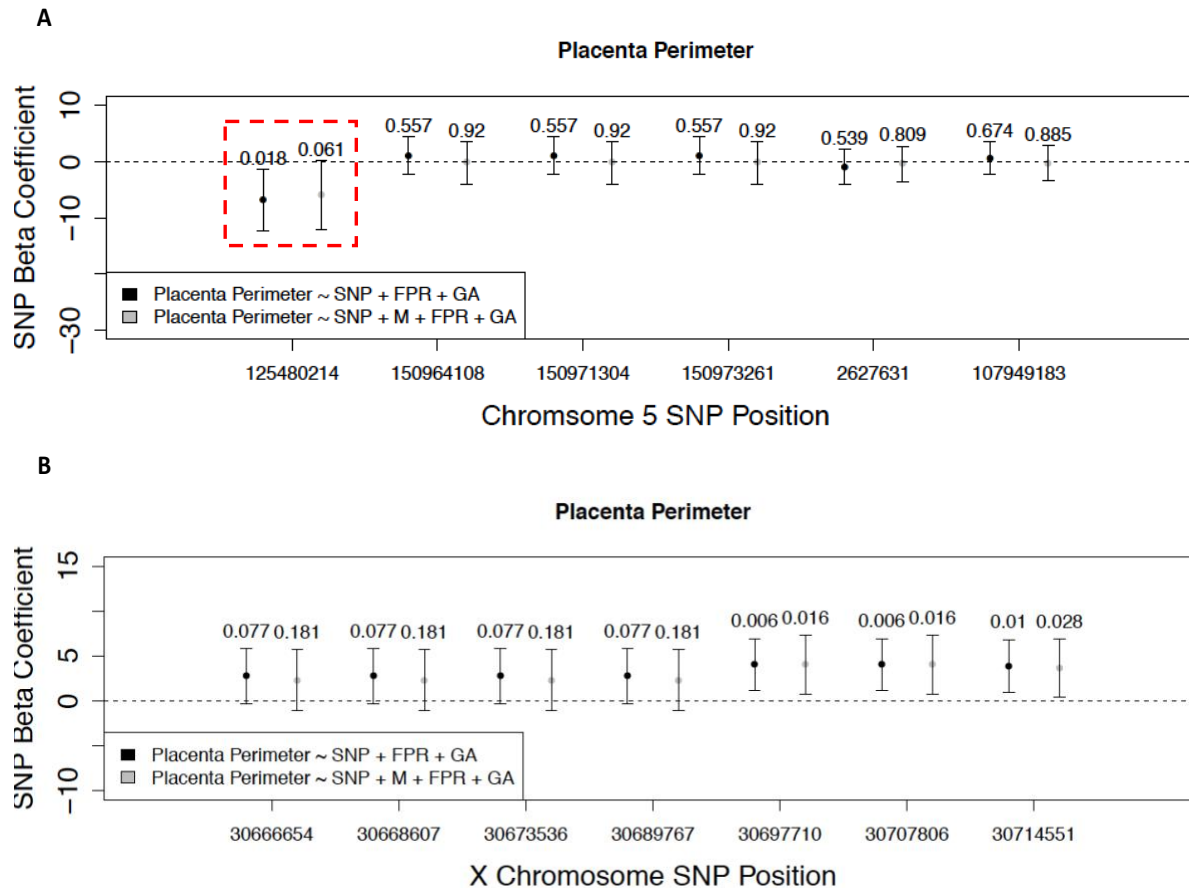

**Supplementary Figure 5: Causal inference testing reveals mediation of genetic variation on placenta perimeter by DNA methylation at the *ZNF300* locus.** Points indicate regression coefficients for SNP genotype terms in a model with the morphological phenotype as an outcome regressed onto the SNP, feto-placental weight ratio (FPR) and gestational age (GA) without (black) and with (gray) average methylation in the *ZNF300* DMR region. Corresponding p-values and error bars are also shown for each point. Red squares are drawn around SNPs showing evidence for mediation of SNP effects on placenta perimeter by *ZNF300* methylation. **A**) Results for chromosome 5 SNPs, and **B**) results from chromosome X SNPs.





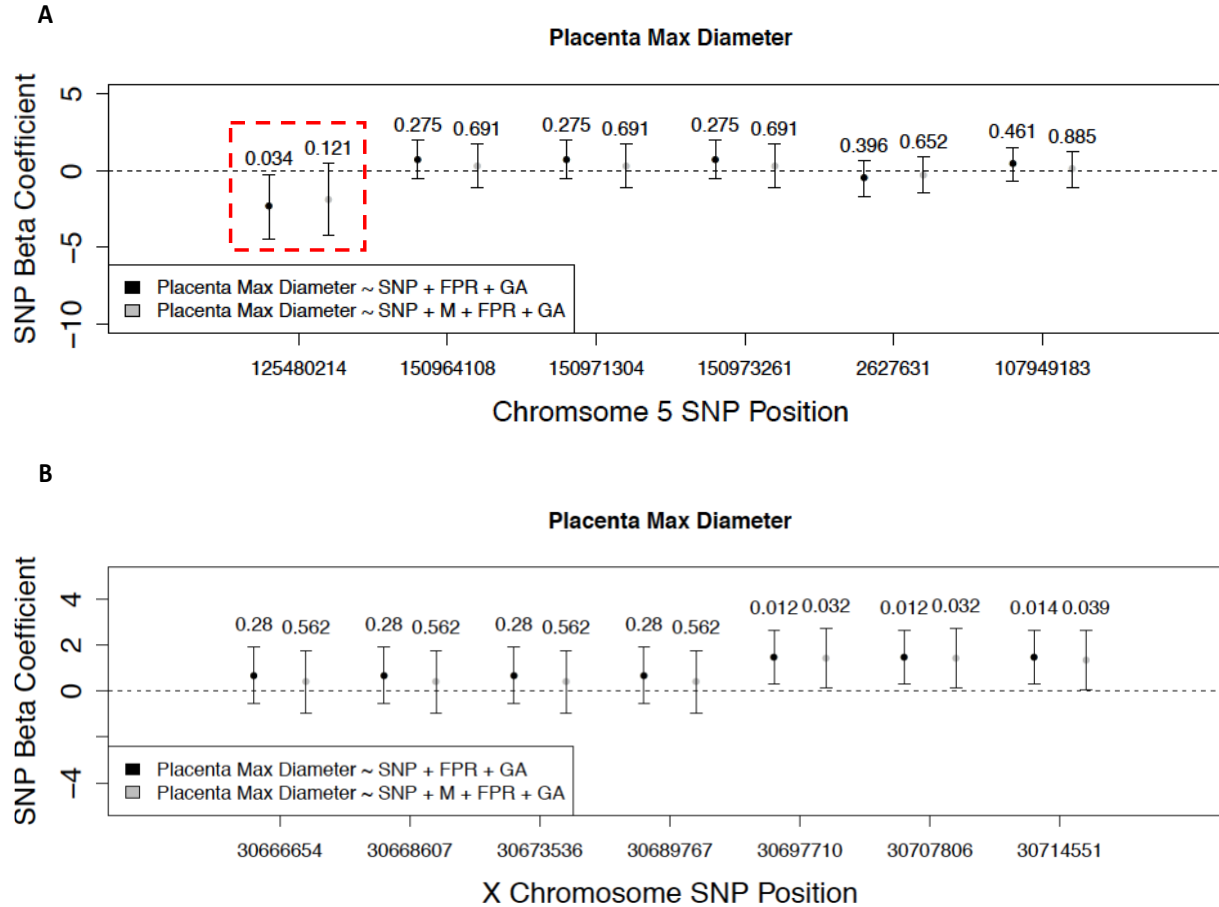

**Supplementary Figure 6: Causal inference testing reveals mediation of genetic variation on placenta max diameter by DNA methylation at the *ZNF300* locus.** Points indicate regression coefficients for SNP genotype terms in a model with the morphological phenotype as an outcome regressed onto the SNP, fetoplacental weight ratio (FPR) and gestational age (GA) without (black) and with (gray) average methylation in the *ZNF300* DMR region. Corresponding p-values and error bars are also shown for each point. Red squares are drawn around SNPs showing evidence for mediation of SNP effects on placenta max diameter by *ZNF300* methylation. **A**) Results for chromosome 5 SNPs, and **B**) results from chromosome X SNPs.

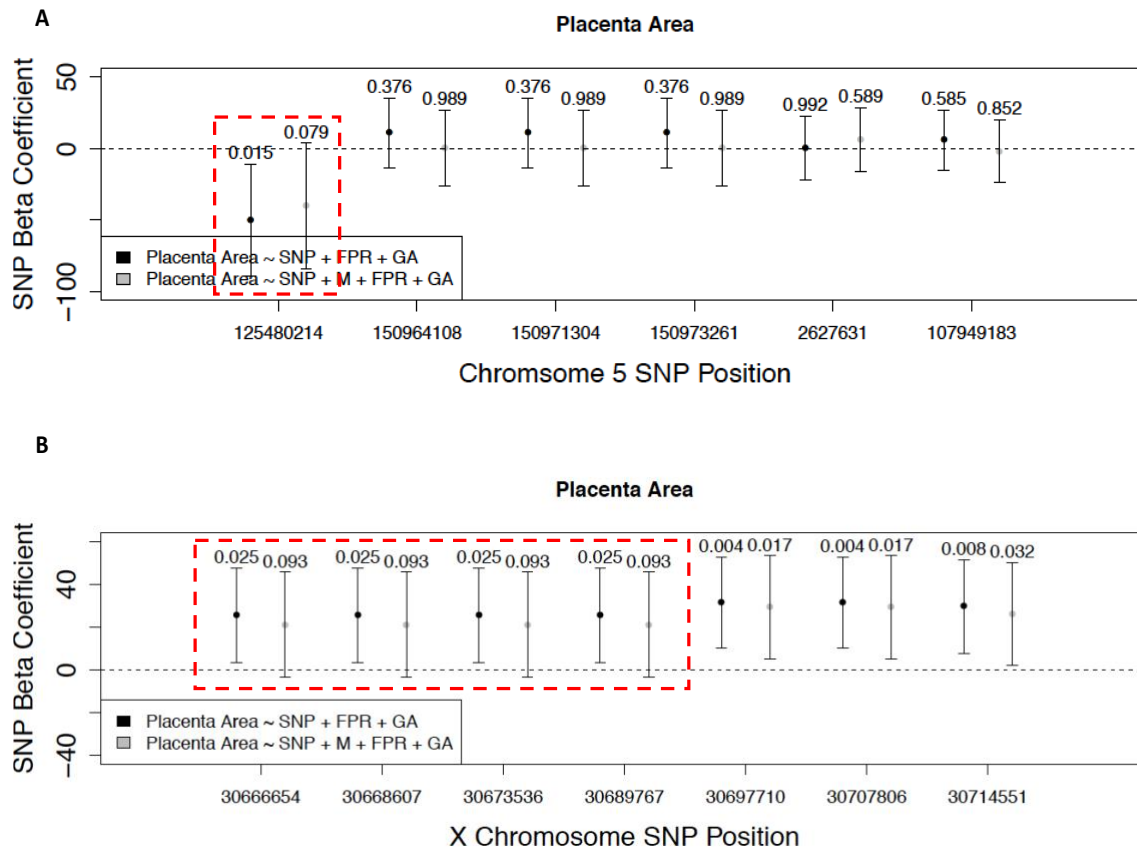

**Supplementary Figure 7: Causal inference testing reveals mediation of genetic variation on placenta area by DNA methylation at the *ZNF300* locus.** Points indicate regression coefficients for SNP genotype terms in a model with the morphological phenotype as an outcome regressed onto the SNP, feto-placental weight ratio (FPR) and gestational age (GA) without (black) and with (gray) average methylation in the *ZNF300* DMR region. Corresponding p-values and error bars are also shown for each point. Red squares are drawn around SNPs showing evidence for mediation of SNP effects on placenta area by *ZNF300* methylation. **A**) Results for chromosome 5 SNPs, and **B**) results from chromosome X SNPs.
